# Supplementary material for: Cep63 and Cep152 Cooperate to Ensure Centriole Duplication
Source: PubMed Central journal article supplement (PMC3728344; doi:10.1371/journal.pone.0069986), 2013-07-30
Supplement: pone.0069986.s007.pdf [file pone.0069986.s007.pdf]

## Supporting Information

### **Cep63 and Cep152 cooperate to ensure centriole duplication.**

Brown *et al.* 2013

### **Supplementary Materials and Methods**

#### ***Supplementary plasmids***

*Xenopus laevis* Cep152 was subcloned from IMAGE: 5084879 into the pMALc4x bacterial expression vector (NEB). *Xenopus laevis* Cep63 was expressed from cDNA (BC088974 *Xenopus laevis* hypothetical LOC496369) in a pCS2 expression vector.

#### ***Xenopus laevis* egg extracts and pull down assays**

Cytostatic factor (CSF) arrested extracts from *Xenopus laevis* eggs, arrested in meiosis II, were made as described previously [1]. SP6 quick-coupled transcription-translation reticulocyte lysate (TNT, Promega) was used to produce *Xenopus laevis* Cep63 protein (XCep63) in the presence of <sup>35</sup>S-methionine (Promix, Amersham). MBP and MBP-*Xenopus laevis* Cep152 (XCep152) were expressed in BL21 CodonPlus (DE3) RIL *E. coli* (Stratagene) at 16 °C for 3 hours after induction with 0.3 mM IPTG (Isopropyl β-D-1-thiogalactopyranoside), and purified using amylose resin according the manufacturer's protocol (NEB). For pull down assays, 2 μg MBP or MBP-XCep152 was coupled to 25 μl amylose resin per reaction, then incubated with 15 μl TNT transcription translation mix containing <sup>35</sup>S-XCep63 or <sup>35</sup>S-Luciferase +/- 150 μl CSF extract (as indicated), diluted to a total volume of 0.2 ml with EB (50 mM HEPES pH7.5, 100 mM KCl, 2.5 mM MgCl<sub>2</sub>), and incubated for 1 hour at 4 °C. Resin was washed extensively with PBS 0.25% Igepal and PBS, then proteins were eluted by boiling in Laemmli buffer, then analysed by SDS-PAGE and autoradiography.

#### ***Cep63 immunoprecipitation***

For IP, 10 μg of pre-immune purified rabbit IgG (control), anti-Cep63 (Millipore), or anti-Cep63 (ProteinTech Group) was added to 2 mg cell lysate (lysis buffer: 50 mM Tris HCl, pH 7.4, 150 mM NaCl, 1 mM EDTA, 1% Triton X100) plus Complete protease inhibitors (Roche) and incubated for 2 hours at 4 °C. 60 μl protein A/G beads (Stratagene) were added to each sample and incubated for 1 hour at 4 °C, then washed in lysis buffer followed by PBS. Proteins were eluted using Laemmli buffer without β-mercaptoethanol, at room temperature, then analysed by SDS-PAGE and Western blotting

with anti-Cep63 (Millipore) and an anti-rabbit light chain specific secondary antibody coupled to HRP (Cell Signaling).

### **Supplementary References**

1. Desai A, Murray A, Mitchison TJ, Walczak CE (1999) The use of *Xenopus* egg extracts to study mitotic spindle assembly and function in vitro. *Methods Cell Biol* 61: 385-412.
